# Supplementary material for: A microgap impedance sensor for the determination of trace water in organic solvents
Source: Royal Society of Chemistry journal article supplement (doi:10.1039/c1an15263g), 2011-01-01
Supplement: c1an15263g.pdf [file c1an15263g.pdf]

## Supporting information

### A microgap impedance sensor for the determination of trace water in organic solvents

*Jie Liang,<sup>a,b</sup> Bao-Qin Chen,<sup>a</sup> and Yi-Tao Long<sup>\*a</sup>*

*<sup>a</sup> Shanghai Key Laboratory of Functional Materials Chemistry & Department of Chemistry, East China University of Science and Technology, Shanghai 200237, China. Fax: +86 21 6425 0032; Tel: +86 21 6425 2339; E-mail: ytlong@ecust.edu.cn*

*<sup>b</sup> Department of Chemistry, Shanghai Normal University, Shanghai 200234, China.*

#### ***Characterization of PDMDAAC-Fe(CN)<sub>6</sub><sup>3-/4-</sup> composite***

The surface morphology of PDMDAAC-Fe(CN)<sub>6</sub><sup>3-/4-</sup> composite was examined by SEM. Figure S1 presents the SEM images of PDMDAAC-Fe(CN)<sub>6</sub><sup>3-/4-</sup> composite. It can be seen that PDMDAAC-Fe(CN)<sub>6</sub><sup>3-/4-</sup> composite has a continuous and uniform structure.

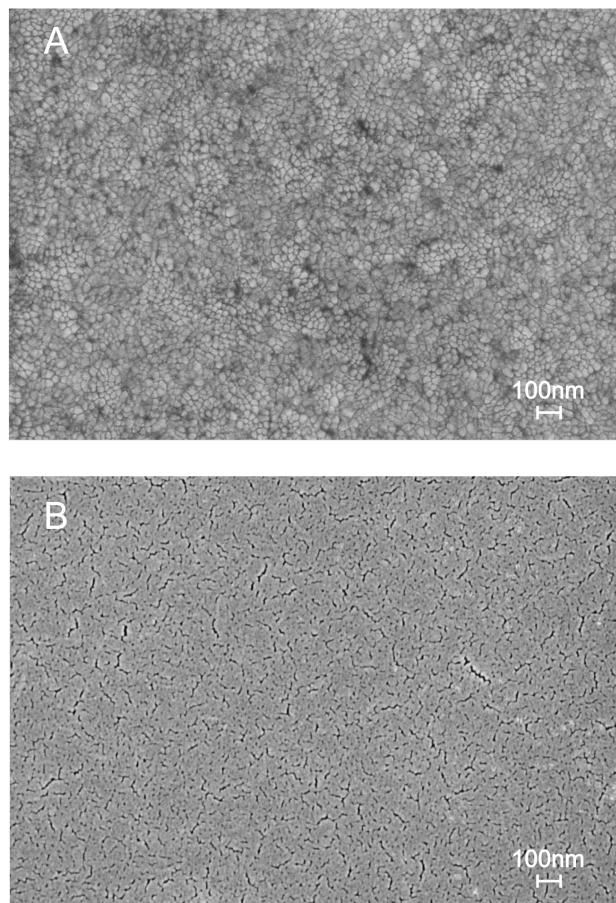

**Figure S1.** SEM images of the surface morphology of A) bare ITO and B) PDMDAAC-Fe(CN)<sub>6</sub><sup>3-/4-</sup> composite/ITO.
